# Supplementary material for: Real-life experience with high-frequency chest wall oscillation vest therapy in adults with non-cystic fibrosis bronchiectasis
Source: PubMed Central journal article supplement — Ther Adv Respir Dis. 2020 Jun 15;14:1753466620932508. doi: 10.1177/1753466620932508 (PMC7297124; doi:10.1177/1753466620932508), 2020-06-15
Supplement: Reviewer_2_v.1.pdf [file Reviewer_2_v.1.pdf]

Reviewer 2 v. 1

Comments to the Author

an interesting real life study
